# Supplementary material
Source: Springer Nature journal article supplement (https://www.springermedizin.de/resource/supplementary/12889_2011_3755_MOESM2_ESM.pdf/9489992)
Supplement: MOESM2 [file 9489992]

### **2005**

-Data source: STEPS;  
Methods type: Questionnaire, anthropometric data, biochemical data;  
Sample size (n): 3411;  
Nationally representative: Yes

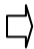

### **2009**

-Data source: STEPS;  
Methods type: Questionnaire, anthropometric data, biochemical data;  
Sample size (n): 5638;  
Nationally representative: Yes

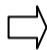

### **2010**

-Data source: KAPS;  
Methods type: Questionnaire; Sample size (n): 3854; Nationally representative: Yes  
  
-Data source: KAP Focus Group;  
Methods type: focus group discussions; Sample size: 6-12 FGD; Nationally representative: No

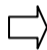

### **2013/2014**

-Data source: STEPS;  
Methods type: Questionnaire, anthropometric data, biochemical data; Sample size (n): ~ 5000; Nationally representative: Yes  
  
-Data source: KAPS;  
Methods type: Questionnaire; Sample size (n): 3854; Nationally representative: Yes  
  
-Data source: KAP Focus Group;  
Methods type: focus group discussions; Sample size (n): ~ 100; Nationally representative: No
